# Supplementary material for: The Peripheral Blood Transcriptome Is Correlated With PET Measures of Lung Inflammation During Successful Tuberculosis Treatment
Source: Front Immunol. 2021 Feb 10;11:596173. doi: 10.3389/fimmu.2020.596173 (PMC7902901; doi:10.3389/fimmu.2020.596173)
Supplement: Supplementary Table 5 — List of PETGenes with similar expression pattern over time, grouped into clusters. [Table_S05.xls] [file Table_5.xlsx]

## Sheet: Cluster1 Genes
Table S5: List of genes in Cluster 1 of PETGenes.
HGNC Symbol
ABLIM3
ACER3
ADRA2A
AFF1
AGPAT3
AIG1
AIM2
AK4
ALOX12
ANKRD22
ANO2
ANO5
ANO6
APOL1
APOL2
APOL4
APOL6
AQP10
ARG2
ARHGAP18
ARHGAP6
ARMC3
ARSB
ASAP2
ASPHD2
ASXL3
ATF3
ATP6V0C
BATF2
BEND2
BNIPL
BTN3A1
C1orf198
C2
C2orf88
C5orf56
CALCOCO2
CALD1
CALHM5
CALHM6
CAPN11
CARD17
CARM1
CASP1
CASP4
CASP5
CASP7
CASZ1
CAV2
CAVIN2
CCDC146
CCRL2
CD274
CD36
CD9
CDC14B
CDH6
CDKN1A
CEACAM1
CETP
CFAP161
CFAP97D1
CGAS
CLEC2L
CLU
CMTM5
COL7A1
CRAT
CREG1
CTDSPL
CTSA
CXCL10
CXCL5
CYBB
DAPP1
DCAF6
DCUN1D3
DDX60
DERA
DGKI
DHRS9
DMXL2
DNM3
DOCK4
DRAM1
DSC2
DTX3L
DUSP3
DYNC1I1
EFCAB2
EGF
EIF4E3
ELOVL7
EMC3
ENDOD1
EPG5
EPSTI1
ERLIN1
ERP44
ESAM
ETFA
ETV7
F13A1
F2RL3
FADS1
FAM151B
FAM20A
FAM241A
FAS
FAXDC2
FBXO6
FBXO9
FCGR1A
FCGR1B
FGL2
FLVCR2
FRMD3
FUCA2
FUT4
FZD5
GADD45B
GADD45G
GALC
GAS6
GASK1B
GBP1
GBP2
GBP3
GBP4
GBP5
GBP6
GCH1
GK
GNG11
GP1BA
GP6
GP9
GPD2
GPR1
GPX1
GRHL1
GRIN3A
GSTM5
GSTO1
GUCY1A1
GUCY1B1
GUK1
GYPC
HACD1
HCAR3
HDAC4
HIST2H2BF
HLA-F
HOMER2
ICAM1
IDH1
IDO1
IFI35
IFIH1
IFIT3
IFITM1
IGF2BP3
IL15
IL15RA
IL27
ILK
IRF1
ITFG1
ITGA2B
ITGB3
ITGB5
JAK2
KCNJ2
KIAA1549
KLHDC7B
KLHDC8A
KREMEN1
LACTB
LANCL3
LAP3
LCP2
LDLR
LHFPL2
LIMK1
LIMS1
LIPM
LMNB1
LPAR1
LPCAT2
LRP12
LTBP1
LTBP2
LY6G6F
LYPD5
LYRM1
LYSMD2
MAOB
MAPRE1
MAX
MCTP1
MED12L
MFSD2B
MGLL
MICB
MITF
MLKL
MMP1
MMRN1
MPIG6B
MR1
MTHFD2
MTHFSD
MTURN
MYL9
MYOF
NBN
NCKAP1
NLRC5
NMU
NPC2
NT5C3A
NTAN1
NUB1
NUCB1
ODF3B
OXTR
P2RX7
P2RY12
P2RY14
PARD3
PARD6A
PARP14
PARP9
PARVB
PCGF5
PCSK6
PCYT1B
PDCD1LG2
PDE3A
PDE5A
PEAR1
PF4
PF4V1
PGRMC1
PIK3AP1
PIM1
PIWIL4
PLA2G12A
PLEK
PLGRKT
PLOD2
PLSCR1
PLSCR4
PLXNB3
POLB
PPBP
PRDM1
PRDX6
PRKAR2B
PRKG1
PRLR
PROS1
PROSER2
PRPS2
PRR11
PRRG4
PRTFDC1
PSMB8
PSMB9
PSME2
PSTPIP2
PTCRA
PTGS1
PTK2
RAB20
RAB27B
RAB4A
RAB6B
RAMP3
RCN1
RDH11
RGS6
RHAG
RHBDF2
RHOBTB1
RIPK2
RSU1
RTP4
SAMD14
SAMD9L
SCARF1
SCD
SCGB1C1
SDC3
SDC4
SECTM1
SELP
SEPT4
SERPINE1
SERPING1
SESTD1
SH3BGRL2
SH3RF1
SLC1A3
SLC20A1
SLC26A8
SLC6A4
SMCO4
SMIM3
SMTNL1
SNTB1
SNX20
SOCS1
SORT1
SPARC
SPPL2A
SPSB4
SPX
SRBD1
SRC
STAT1
STAT2
STMP1
STN1
STOM
STON2
STRIP2
SUCNR1
SUSD1
SYTL4
TAP1
TAP2
TCN2
TDRP
TFPI
TGFB1I1
TGM2
TIFA
TJP2
TMEM158
TMEM40
TMEM51
TNFAIP6
TNFSF10
TNFSF4
TPM1
TPM4
TRAFD1
TRANK1
TRAPPC3L
TREML1
TRIM21
TRIM22
TSC22D1
TSPAN9
TTC7B
TTLL7
TUBA1C
TUBB1
TYMP
UBE2L6
VAMP5
VCL
VCPIP1
VEPH1
VIL1
VRK2
VSIG10
WARS
WASF3
WDFY1
WFDC1
WSB2
XK
XPNPEP1
XRN1
ZC3HAV1L
ZNF438

## Sheet: Cluster2 Genes
Table S4: List of genes in Cluster 2 of PETGenes.
HGNC Symbol
ADAM28
AFF3
AKR1B1
AMOT
ANKZF1
AOC3
ARHGEF19
ATAT1
BAIAP2
BEST4
BHLHE41
BMP3
BSN
C11orf80
C15orf62
C16orf74
C1QTNF6
C6orf136
CA11
CAMK2N1
CBX7
CBY1
CCDC106
CCN2
CCR6
CD200
CDAN1
CDK3
CDPF1
CEACAM19
CEP164
CEP250
CHAD
CILP
CIRBP
CNFN
COBL
COCH
COL11A2
COL13A1
COL4A4
COQ10A
CROCC
CRY2
CSNK1E
CTTNBP2
CXCR5
DAAM2
DCAF4
DCUN1D2
DDX27
DDX28
DDX51
DDX55
DNASE1L3
DOK7
DPH7
DTX4
EBI3
EFCAB1
ENTR1
EPHA4
EPHB6
EZH1
FADS3
FAM167A
FAM71E1
FANCE
FCMR
FCRL1
FCRL3
FCRL5
FGFBP3
FILIP1L
GDF7
GEMIN6
GGA2
GIGYF1
GLS2
GNG7
GPATCH4
GRASP
GTF2IRD2B
HIP1R
HTR3A
ID3
IFT172
IL24
IMPDH2
ISYNA1
JOSD1
KAT2A
KIAA0355
LILRA4
LRRC14
LUC7L
MAP7D3
MARC2
MARCH9
MC1R
MICAL3
MIEF2
MORN1
MRNIP
MRPS27
MS4A1
MXRA8
MYO1D
N4BP3
NAB2
NAPSA
NEIL1
NETO1
NLE1
NLRP1
NOA1
NOL9
NVL
PARM1
PBXIP1
PC
PHF24
PIK3C2B
PLA2G2D
PLEKHG5
POLR3B
POU2AF1
POU5F1B
PPARGC1B
PPM1J
PRDM4
PRKRIP1
PROC
PRPF4
PYCR3
RABL2A
RABL2B
RASD1
RASGRF1
RBFA
REELD1
RNF216
RPUSD4
RUBCNL
SDC2
SDR16C5
SEL1L3
SEMA6C
SENP3
SERPINF1
SFTPD
SHF
SIN3B
SMYD4
SMYD5
SNRNP70
SPG7
SRRM5
SUPV3L1
SYN3
SYNPO
TBX6
TEAD2
TGIF1
TMEM132A
TMEM231
TMEM8B
TNFRSF13B
TNR
TRAF4
TRMT10B
TSPYL2
TTC9
TYSND1
UBTF
USP51
VAMP2
WDPCP
WFS1
WHRN
WNT3
ZNF211
ZNF3
ZNF343
ZNF395
ZNF587B
ZNF74
ZNF814
ZNF860
ZSCAN18
ZSCAN2

## Sheet: Cluster3 Genes
Table S4: List of genes in Cluster 3 of PETGenes.
HGNC Symbol
ABCB4
BANK1
BCL11A
BCL7A
BCS1L
BLK
BLNK
C1orf115
CAPN14
CD19
CD22
CD72
CD79A
CD79B
CLEC17A
COBLL1
CORO2B
CREB3L4
CXXC5
DFFA
DNALI1
EBF1
ESPNL
FAM129C
FBXO10
FCER2
FCRL2
FCRLA
GRB7
HIRIP3
HLA-DOA
HLA-DOB
HS3ST1
ICOSLG
ILDR1
LAMA5
LARGE1
LARGE2
LCN10
MMP11
NXPH4
OSBPL10
P2RX5
PABPC4
PALD1
PAX5
PCDH9
PGAM5
PLEKHG1
PLPP5
PMEPA1
PNOC
RBM4B
RBSN
RRS1
SHISA8
SLC17A9
SNX22
SPIB
SURF6
TCL1B
TNFRSF13C
VPREB3
XCR1
ZNF324B
ZNF425
